# Supplementary material for: A meta-model of low back pain to examine collective expert knowledge of the effects of treatments and their mechanisms
Source: Research Square preprint supplement (doi:10.21203/rs.3.rs-7844247/v1), 2025-10-30
Supplement: Supplementary file 1 [file 8bcb9a99a8de8aaf456dfc15.xlsx]

## Sheet: Description
Title:	A meta-model of low back pain to examine collective expert knowledge of the effects of treatments and their mechanisms
Content:	First level (direct) Connections between Treatments/Interventions and all Mediators
	Sums of Centralities for each Domain are also provided. For each Treatment/Intervention, a sum of the absolute values of all Connections in and out of all Mediators was calculated within each Domain
Domains Legend:		Outcomes
		Behavioral/Lifestyle
		Biomechanical factors
		Individual factors
		Comorbidities
		Tissue injury or pathology
		Psychological factors
		Nociceptive detection and processing
		Social/ Work/Contextual factors
		Treatment/Intervention

## Sheet: Treatment Mediators
Treatment/Intervention Domain	Outcomes	Behavioral/ Lifestyle	Biomechanical factors	Individual factors	Comorbidities	Tissue injury or pathology	Psychological factors	Nociceptive detection and processing	Social/Work/ Contextual factors
Acceptance and commitment therapy / Sum Centrality	0.136207	0	0.0131034	0.0210345	0.0213793	0.06	0.217069	0.0344828	0.0255172
Access to support networks									0.0117241
Behavioral (e.g., coping, pain behavior, activity avoidance)							0.0389655
Cognitive (e.g., expectations, beliefs, perceptions concerning pain)							-0.0527586
Disability	-0.0244828
Emotional (e.g., distress, anxiety, depression)							-0.0772414
Fatigue (mental and physical)							-0.0268966
Identity				0.0210345
Mechanical overloading			-0.0131034
Negative sensory input								-0.0344828
Overweight (obesity/BMI)					-0.0213793
Pain	-0.0631034
Peripheral nerve injury						-0.02
Positive psychological factors							0.0212069
Quality of life	0.0486207
Tissue damage						-0.04
Work satisfaction									0.0137931
Acupuncture / Sum Centrality	0.0675862	0	0	0	0	0.0537931	0.0217241	0	0
Emotional (e.g., distress, anxiety, depression)							-0.0217241
Pain	-0.042069
Peripheral nerve injury						-0.0248276
Quality of life	0.0255172
Tissue damage						-0.0289655
Advice/Education / Sum Centrality	0.164138	0.00655172	0.00862069	0.0506897	0	0	0.0905747	0.0189655	0.0582759
Autonomy									0.0237931
Behavioral (e.g., coping, pain behavior, activity avoidance)							0.02
Biomechanical risks			-0.00862069
Central sensitization								-0.0151724
Cognitive (e.g., expectations, beliefs, perceptions concerning pain)							-0.061954
Disability	-0.0651724
Health literacy on LBP				0.0237931
Life demands		-0.00655172
Negative life social factors									-0.00862069
Neurological pain generation								-0.0037931
Pain	-0.0672414
Person-centered care									0.0258621
Physiological risks				-0.0268966
Psychological risks							-0.00862069
Quality of life	0.0317241
Anti-epileptic and anti-depressant drugs / Sum Centrality	0.0144828	0	0	0	0	0	0.0458621	0.0144828	0
Emotional (e.g., distress, anxiety, depression)							-0.0458621
Negative sensory input								-0.0144828
Pain	-0.0144828
Anti-inflammatory medication / Sum Centrality	0.0306897	0	0	0	0	0.0813793	0	0.0393103	0
Inflammation						-0.0641379
Muscle strain						-0.0172414
Negative sensory input								-0.027931
Pain	-0.0306897
Peripheral sensitization								-0.0113793
Bio-Psycho-social risk management / Sum Centrality	0.0844828	0	0.0111494	0.0317241	0.0296552	0	0.0428736	0	0.136322
Access to support networks									0.0172414
Biomechanical risks			-0.0111494
Disability	-0.027931
Economic risks									-0.0248276
Evidence based care pathway									-0.0324138
History of pain				-0.0317241
Negative life environment									-0.0258621
Negative life social factors									-0.0111494
Overweight (obesity/BMI)					-0.0296552
Pain	-0.0286207
Person-centered care									0.0248276
Positive psychological factors							0.0317241
Psychological risks							-0.0111494
Quality of life	0.027931
Cognitive behavioral therapy (CBT) / Sum Centrality	0.492414	0.0596552	0.0206897	0.042069	0.0362069	0.0134483	0.497989	0.0155172	0.124138
Access to support networks									0.00758621
Autonomy									0.0248276
Behavioral (e.g., coping, pain behavior, activity avoidance)							0.0734483
Biomechanical risks			-0.00931034
Central sensitization								-0.00482759
Cognitive (e.g., expectations, beliefs, perceptions concerning pain)							-0.133506
Cognitive (mental) function				0.0172414
Disability	-0.184138
Emotional (e.g., distress, anxiety, depression)							-0.154138
Fatigue (mental and physical)							-0.0244828
Good physical activity		0.0106897
Good sleep		0.027931
Health literacy on LBP				0.00758621
History of pain				-0.0172414
Life demands		-0.0210345
Medical comorbidities					-0.00758621
Negative life social factors									-0.00931034
Negative psychological factors							-0.0175862
Negative sensory input								-0.0106897
Optimal motor control			0.0113793
Overweight (obesity/BMI)					-0.0286207
Pain	-0.154138
Person-centered care									0.0306897
Positive psychological factors							0.0855172
Psychological risks							-0.00931034
Quality of life	0.154138
Social roles fulfilled									0.0172414
Social roles unfulfilled									-0.0172414
Tissue damage						-0.0134483
Work satisfaction									0.0172414
Complementary Treatments / Sum Centrality	0.00965517	0	0	0	0	0	0.0172414	0	0
Disability	-0.0037931
Pain	-0.00586207
Positive psychological factors							0.0172414
Denervation interventions / Sum Centrality	1.37276							-0.00586207
Neurological pain generation								-0.0037931
Pain	-0.0037931
Peripheral sensitization								-0.00206897
Dry needling / Sum Centrality	0.721379		0.00827586
Optimal motor control			0.00827586
Ergonomic interventions / Sum Centrality	0.36069		-0.0134483						-0.000344828
Mechanical overloading			-0.0134483
Negative life social factors									-0.0144828
Positive life social factors									0.0141379
Exercise Therapy / Sum Centrality	0.258966	0.0489655	0.123391	0.0544828	0.0286207	0.0468966	0.062069	0.0513793	0.0710345
Activity limitation	-0.027931
Autonomy									0.0258621
Behavioral (e.g., coping, pain behavior, activity avoidance)							0.0103448
Biomechanical risks			-0.00862069
Central sensitization								-0.0189655
Cognitive (e.g., expectations, beliefs, perceptions concerning pain)							-0.00758621
Disability	-0.0737931
Diseases (e.g., infections, rheumatoid arthritis, malignancies)					-0.0037931
Emotional (e.g., distress, anxiety, depression)							-0.0172414
Exercise		0.027931
General health				0.0124138
Good paraspinal muscle quality						0.0324138
History of pain				-0.0172414
Inflammation						-0.0144828
Life demands		-0.0037931
Low physical activity		-0.0172414
Mechanical overloading			-0.0106897
Motor Impairment			-0.0251724
Negative biological factors (e.g., postural control, genetics, tissue damage, central sensitization)								-0.0324138
Negative life social factors									-0.0193103
Negative psychological factors							-0.0182759
Optimal motor control			0.0175862
Overweight (obesity/BMI)					-0.0248276
Pain	-0.0948276
Person-centered care									0.0258621
Physical capacity			0.0287356
Physiological risks				-0.0248276
Poor anatomical/structural characteristics			-0.0282759
Psychological risks							-0.00862069
Quality of life	0.0624138
Strength			0.00431034
Graded Activity / Sum Centrality	0.0755172	0	0.00862069	0	0.0258621	0	0.0344828	0	0.0382759
Autonomy									0.0296552
Biomechanical risks			-0.00862069
Cognitive (e.g., expectations, beliefs, perceptions concerning pain)							-0.0258621
Disability	-0.0258621
Negative life social factors									-0.00862069
Overweight (obesity/BMI)					-0.0258621
Pain	-0.0248276
Psychological risks							-0.00862069
Quality of life	0.0248276
Massage / Sum Centrality	0.0648276	0	0	0	0	0.0541379	0.0212069	0	0
Emotional (e.g., distress, anxiety, depression)							-0.0212069
Pain	-0.0393103
Peripheral nerve injury						-0.0251724
Quality of life	0.0255172
Tissue damage						-0.0289655
Medication (Biologicals) / Sum Centrality	0	0	0	0	0	0.0317241	0	0	0
Inflammation						-0.0317241
Motivational interview / Sum Centrality	0	0	0	0	0	0	0.0144828	0.0144828	0
Negative biological factors (e.g., postural control, genetics, tissue damage, central sensitization)								-0.0144828
Negative psychological factors							-0.0144828
Multi-disciplinary treatments (biopsychosocial treatments) / Sum Centrality	0.0834483	0.0131034	0	0.0113793	0	0.0382759	0.0182759	0	0.00758621
Disability	-0.0296552
General health				0.0113793
Inflammation						-0.0144828
Negative life social factors									-0.0037931
Negative lifestyle factors		-0.00655172
Negative psychological factors							-0.0106897
Pain	-0.0317241
Positive life social factors									0.0037931
Positive lifestyle factors		0.00655172
Positive psychological factors							0.00758621
Quality of life	0.022069
Tissue damage						-0.0237931
Nutritional Counseling / Sum Centrality	0.0786207	0	0.00862069	0.0517241	0.0258621	0	0.0365517	0	0.00862069
Biomechanical risks			-0.00862069
Disability	-0.0210345
History of pain				-0.0258621
Negative life social factors									-0.00862069
Overweight (obesity/BMI)					-0.0258621
Pain	-0.027931
Physiological risks				-0.0258621
Positive psychological factors							0.027931
Psychological risks							-0.00862069
Quality of life	0.0296552
Pain medication / Sum Centrality	0.16931	0.027931	0	0	0.0258621	0.0365517	0.0789655	0.171034	0.0037931
Central sensitization								-0.0191379
Disability	-0.0113793
Diseases (e.g., infections, rheumatoid arthritis, malignancies)					-0.0182759
Emotional (e.g., distress, anxiety, depression)							-0.0682759
Exercise		0.0037931
Good sleep		0.0241379
Impaired body structure and function	0.0106897
Inflammation						-0.0193103
Medical comorbidities					-0.00758621
Negative biological factors (e.g., postural control, genetics, tissue damage, central sensitization)								-0.0189655
Negative life social factors									-0.0037931
Negative psychological factors							-0.0106897
Negative sensory input								-0.0724138
Neurological pain generation								-0.0510345
Pain	-0.136552
Peripheral sensitization								-0.00948276
Quality of life	0.0106897
Tissue degeneration						-0.0172414
Pain relieving intervention / Sum Centrality	0.0965517	0	0	0.0451724	0	0.0134483	0.0958621	0	0
Cognitive (e.g., expectations, beliefs, perceptions concerning pain)							-0.0258621
Disability	-0.0258621
Emotional (e.g., distress, anxiety, depression)							-0.0258621
Fatigue (mental and physical)							-0.0268966
History of pain				-0.0172414
Pain	-0.0448276
Physiological risks				-0.027931
Positive psychological factors							0.0172414
Quality of life	0.0258621
Tissue damage						-0.0134483
Physical treatment / Sum Centrality	0.234483	0.0172414	0.0662069	0	0	0.0544828	0.0934483	0.0210345	0
Activity limitation	-0.0344828
Cognitive (e.g., expectations, beliefs, perceptions concerning pain)							-0.0255172
Disability	-0.0489655
Emotional (e.g., distress, anxiety, depression)							-0.0262069
Fatigue (mental and physical)							-0.0244828
Good paraspinal muscle quality						0.0182759
Good sleep		0.0172414
Inflammation						-0.00758621
Mechanical overloading			-0.0172414
Motor Impairment			-0.0317241
Negative sensory input								-0.0210345
Pain	-0.11
Participation Limitation	0.0172414
Positive psychological factors							0.0172414
Quality of life	0.0237931
Spinal instability			-0.0172414
Tissue damage						-0.0286207
Posture and movement training / Sum Centrality	0.154138	0.0134483	0.172184	0.0172414	0.0172414	0.027931	0.0970115	0.0410345	0.00701149
Behavioral (e.g., coping, pain behavior, activity avoidance)							0.0172414
Biomechanical risks			-0.00701149
Cognitive (e.g., expectations, beliefs, perceptions concerning pain)							-0.0727586
Disability	-0.0448276
Good posture and alignment			0.0310345
History of pain				-0.0172414
Low physical activity		-0.0134483
Mechanical overloading			-0.0289655
Motor Impairment			-0.0624138
Negative biological factors (e.g., postural control, genetics, tissue damage, central sensitization)								-0.00655172
Negative life social factors									-0.00701149
Negative sensory input								-0.0344828
Optimal motor control			0.0255172
Overweight (obesity/BMI)					-0.0172414
Pain	-0.07
Poor anatomical/structural characteristics			-0.0172414
Psychological risks							-0.00701149
Quality of life	0.0393103
Tissue damage						-0.027931
Psychological intervention / Sum Centrality	0.0410345	0.0151724	0.0172414	0	0	0	0.126207	0.0037931	0
Behavioral (e.g., coping, pain behavior, activity avoidance)							0.0162069
Central sensitization								-0.0037931
Cognitive (e.g., expectations, beliefs, perceptions concerning pain)							-0.0189655
Disability	-0.022069
Emotional (e.g., distress, anxiety, depression)							-0.0586207
Life demands		-0.00862069
Negative psychological factors							-0.0248276
Pain	-0.0189655
Physical capacity			0.0172414
Poor sleep		-0.00655172
Positive psychological factors							0.00758621
Public health/Occupational interventions / Sum Centrality	0	0	0.0258621	0.027931	0	0	0.0517241	0	0.0212069
Access to support networks									0.0239655
Emotional (e.g., distress, anxiety, depression)							-0.0258621
Fatigue (mental and physical)							-0.0258621
General health				0.027931
Mechanical overloading			-0.0258621
Social roles fulfilled									0.022069
Work dissatisfaction									-0.0248276
Relaxation / Sum Centrality	0	0	0	0	0	0	0.02	0.0124138	0
Negative biological factors (e.g., postural control, genetics, tissue damage, central sensitization)								-0.0124138
Negative psychological factors							-0.02
Sleep restoration / Sum Centrality	0.0755172	0	0	0.0258621	0.0258621	0	0	0	0
Disability	-0.0210345
Overweight (obesity/BMI)					-0.0258621
Pain	-0.0286207
Physiological risks				-0.0258621
Quality of life	0.0258621
Slow movement and stretching (e.g., Yoga) / Sum Centrality	0.0113793	0	0	0	0	0	0.0151724	0.0106897	0
Emotional (e.g., distress, anxiety, depression)							-0.0151724
Negative sensory input								-0.0106897
Pain	-0.0113793
Social intervention / Sum Centrality	0	0.00655172	0	0	0	0	0.0144828	0	0.027931
Behavioral (e.g., coping, pain behavior, activity avoidance)							0.0144828
Life demands		-0.00655172
Negative life social factors									-0.027931
Spinal injections / Sum Centrality	0.0231034	0	0	0	0	0.0182759	0	0.0210345	0
Neurological pain generation								-0.0210345
Pain	-0.0231034
Tissue degeneration						-0.0182759
Spinal manipulation/manual therapy / Sum Centrality	0.133448	0	0.102241	0	0	0.0531034	0.0610345	0.0286207	0
Cognitive (e.g., expectations, beliefs, perceptions concerning pain)							-0.0393103
Disability	-0.0351724
Emotional (e.g., distress, anxiety, depression)							-0.0217241
Good posture and alignment			0.0272414
Impaired body structure and function	-0.0106897
Mechanical overloading			-0.0172414
Motor Impairment			-0.0210345
Negative sensory input								-0.00758621
Optimal motor control			0.0194828
Pain	-0.062069
Peripheral nerve injury						-0.0251724
Peripheral sensitization								-0.0210345
Poor posture and alignment			-0.0172414
Quality of life	0.0255172
Tissue damage						-0.027931
Spinal stimulators / Sum Centrality	0.0182759	0	0	0	0	0	0	0.0113793	0
Disability	-0.0037931
Neurological pain generation								-0.0113793
Pain	-0.0144828
Spinal Surgery / Sum Centrality	0.112414	0	0.0393103	0	0.0037931	0.184655	0.00655172	0.0431034	0
Disability	-0.0286207
Disc herniation						-0.0517241
Diseases (e.g., infections, rheumatoid arthritis, malignancies)					-0.0037931
Good paraspinal muscle quality						-0.022069
Impaired body structure and function	0.0037931
Negative sensory input								-0.0144828
Neurological pain generation								-0.0286207
Pain	-0.0524138
Peripheral nerve injury						-0.027931
Poor anatomical/structural characteristics			-0.00758621
Positive psychological factors							0.00655172
Quality of life	0.0275862
Spinal instability			-0.027931
Spinal stenosis						-0.0182759
Strength			-0.0037931
Tissue damage						-0.017931
Tissue degeneration						-0.0467241
Taping and braces / Sum Centrality	0	0	0	0	0	0	0	0.0255172	0
Negative sensory input								-0.0255172
Treatment of addiction / Sum Centrality	0.0796552	0	0.00862069	0.0248276	0	0	0.00862069	0	0.00862069
Biomechanical risks			-0.00862069
Disability	-0.027931
Negative life social factors									-0.00862069
Pain	-0.0237931
Physiological risks				-0.0248276
Psychological risks							-0.00862069
Quality of life	0.027931
Ultrasound biofeedback training	0	0	0.0344828	0	0	0	0	0	0
Optimal motor control			0.0344828
Wait and See (monitoring) / Sum Centrality	0.0182759	0	0	0	0	0	0	0	0
Disability	-0.0144828
Pain	-0.0037931
Weight Loss / Sum Centrality	0.0441379	0	0.0172414	0	0.0344828	0	0	0	0
Disability	-0.0172414
Mechanical overloading			-0.0172414
Overweight (obesity/BMI)					-0.0344828
Pain	-0.0134483
Quality of life	0.0134483
