# Supplementary material for: A meta-model of low back pain to examine collective expert knowledge of the effects of treatments and their mechanisms
Source: Research Square preprint supplement (doi:10.21203/rs.3.rs-7844247/v1), 2025-10-30
Supplement: Supplementary file 2 [file f720d90fffde7869bc00dcc4.docx]

**A meta-model of low back pain to examine collective expert knowledge of the effects of treatments and their mechanisms**

**Online Resource 1:** Changes to Component terminology and Domain classification since previous publication [2].

|  | **Change** |
| --- | --- |
| 1 | In consultation with the participant, “Counseling and Education about the aerobic exercise” was incorporated into “Cognitive behavioral therapy” and removed as a stand-alone Treatment/Intervention Component. |
| 2 | “Spinal manipulation” and “Manual therapy” were merged into a new Treatment/Intervention Component “Spinal manipulation/Manual therapy.” |
| 3 | “Alternative therapy” was incorporated into “Complementary treatments” and removed as a stand-alone Treatment/Intervention Component. |
| 4 | “Good clinical interventions (e.g., bio-medication physiotherapy psychosocial interventions)” was moved from “Pain relieving intervention” to “Multidisciplinary treatments (biopsychosocial treatments).” |
| 5 | Two Components “Patient's adherence to care” and “Environmental demands” proposed in the previous study, were removed, because there were no Connections with any other Components identified. |
| 6 | “Person-centered care” was reclassified from “Treatment/Intervention” to “Social/Work/Contextual” Domain. |
| 7 | In consultation with the participant, “Conservative musculoskeletal therapies such as manipulation massage and acupuncture” that was previously attributed to “Complementary Treatments” was moved to “Physical treatment” |
| 8 | “Placebo” from a contributor that was previously attributed to “Psychological intervention” in Treatment/Intervention Domain was moved to “Positive psychological factors” in the Psychological factors Domain. |
| 9 | "Myofascial trigger point" was reclassified from “Treatment/Intervention” to “Tissue injury” Domain. |
